# Supplementary figures and images for: Pdcd4–Rictor Interaction Suppresses PFKFB3 to inhibit Tumorigenesis
Source: Research Square preprint supplement (doi:10.21203/rs.3.rs-9172690/v1), 2026-04-22

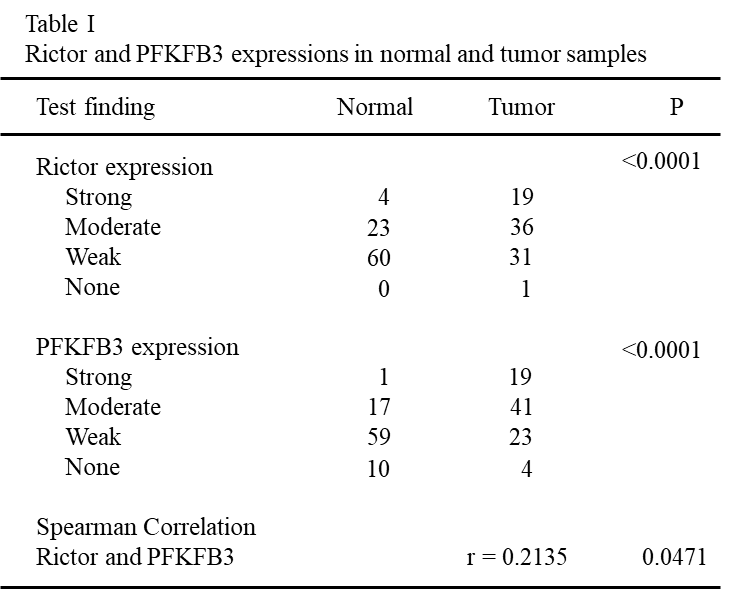

Supplement: Supplementary file 1 [file 798bc77c9779c7a44f9949fb.docx]
